# Supplementary material for: Donor–π–acceptor (D–π–A) dyad for ratiometric detection of Hg2+ and PPi
Source: Royal Society of Chemistry journal article supplement (doi:10.1039/c8nj00741a), 2018-01-01
Supplement: c8nj00741a1.pdf [file c8nj00741a1.pdf]

## Supporting information

### Donor- $\pi$ -Acceptor (D- $\pi$ -A) Dyad for ratiometric detection of Hg<sup>2+</sup> and PPI

Richa Rani, Gulshan Kumar, Kamaldeep Paul and Vijay Luxami\*

School of Chemistry and Biochemistry, Thapar University, Patiala-147004, INDIA

Email: [vluxami@thapar.edu](mailto:vluxami@thapar.edu)

### Table of Contents

**Figure S1:** <sup>1</sup>H NMR spectrum of dyad **1**.

**Figure S2:** <sup>13</sup>C NMR spectrum of dyad **1**.

**Figure S3:** Mass spectrum of dyad **1**.

**Figure S4.** Benesi-Hildebrand plot for stability constant and calibration curve for lowest detection limit for of dyad **1**.Hg<sup>2+</sup> complex.

**Figure S5.** Job Plot for dyad **1**.Hg<sup>2+</sup>

**Figure S6.** Colour changes of dyad **1** for PPI ions

**Figure S7.** Benesi-Hildebrand plot for stability constant and calibration curve for lowest detection limit for dyad **1**.PPI adduct.

**Figure S8.** The molecular graph of dyad **1**.PPI, with bond critical points and bond paths at interaction of dyad **1** towards PPI ions

**Table S1.** Topological parameters Laplacian electron density ( $\nabla^2\rho$ ), potential energy density [V(r)], Lagrangian kinetic energy G(r), total energy density [H(r)], hydrogen bonding energy [E<sub>HB</sub>(kJmol<sup>-1</sup>)] at a bond critical pint of non-covalent interactions (D $\cdots$ HA) for dyad **1**.PPI adduct at B3LYP/6-31G\*\*.

**Figure S8.** Calibration curve for variable concentration of Hg<sup>2+</sup> ions.

**Figure S9.** Reports of analysis Hg<sup>2+</sup> ions two water samples though AAS.

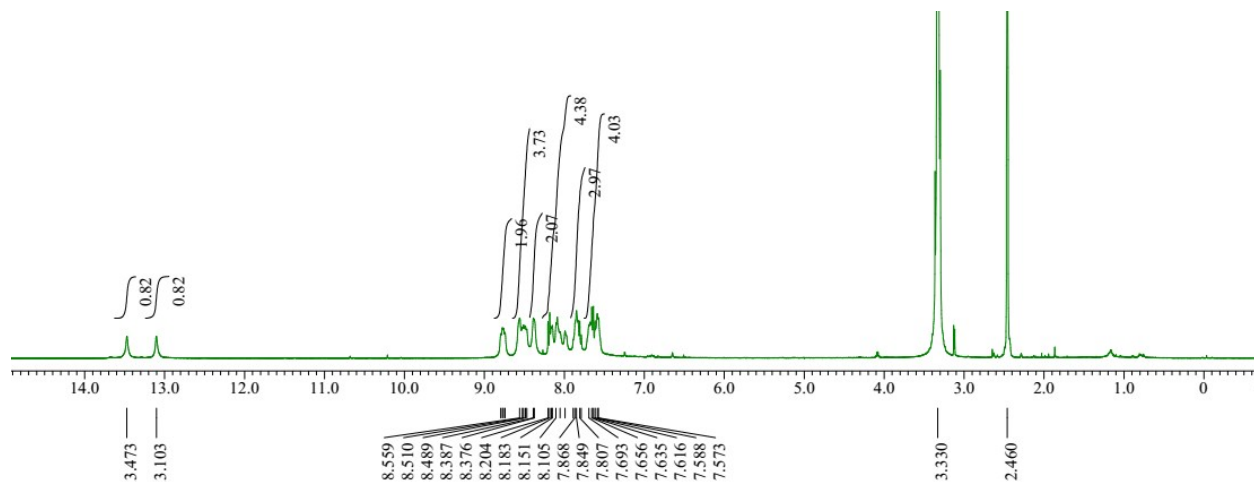

**Figure S1.**  $^1\text{H}$ NMR of dyad 1

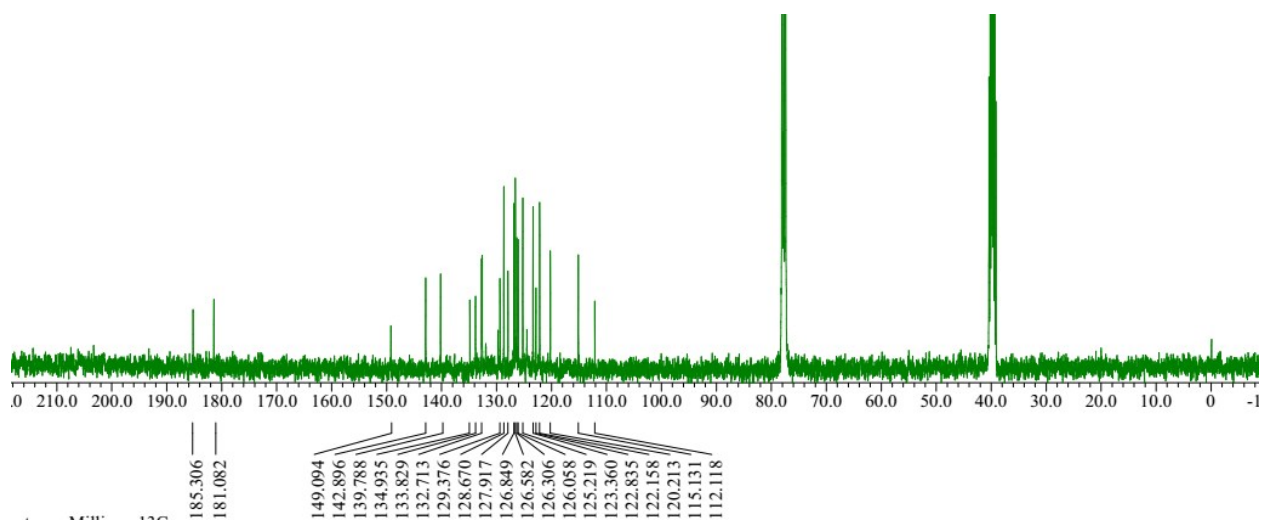

**Figure S2.**  $^{13}\text{C}$ NMR of dyad 1

WATERS, Q-TOF MICROMASS (ESI-MS)

RUHI RR-507 26 (0.603) Cm (26:48)

SAIF/CIL,PANJAB UNIVERSITY,CHANDIGARH

TOF MS ES+  
1.42e3

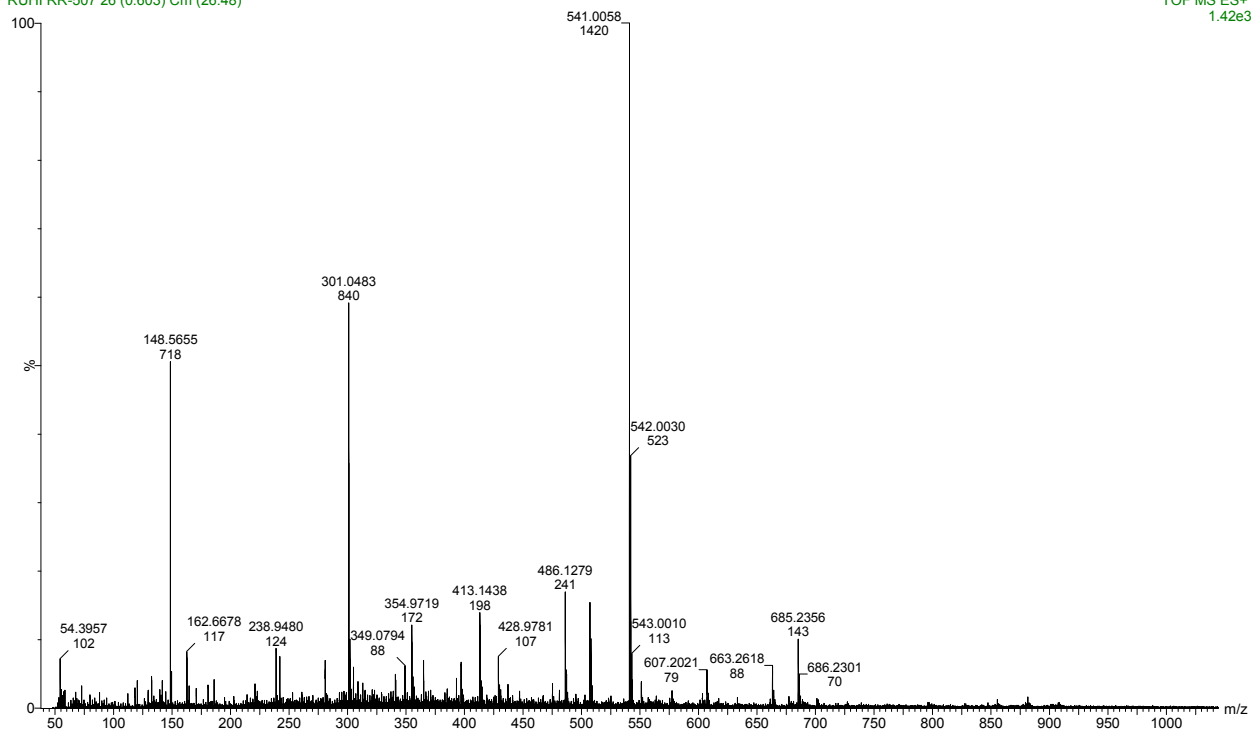

**Figure S3.** Mass spectrum of dyad 1

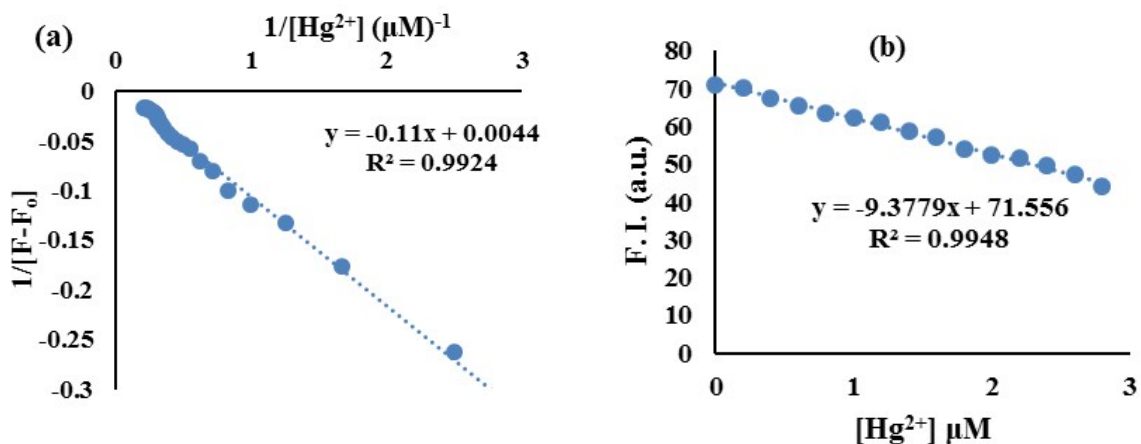

**Figure S4.** (a) Benesi-Hildebrand plot for stability constant and (b) calibration curve for lowest detection limit for of complex.

dyad 1.Hg<sup>2+</sup>

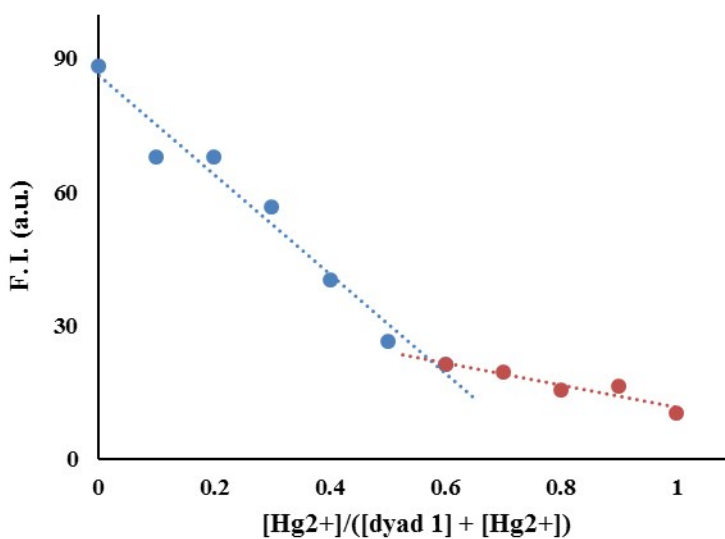

**Figure S5.** Job

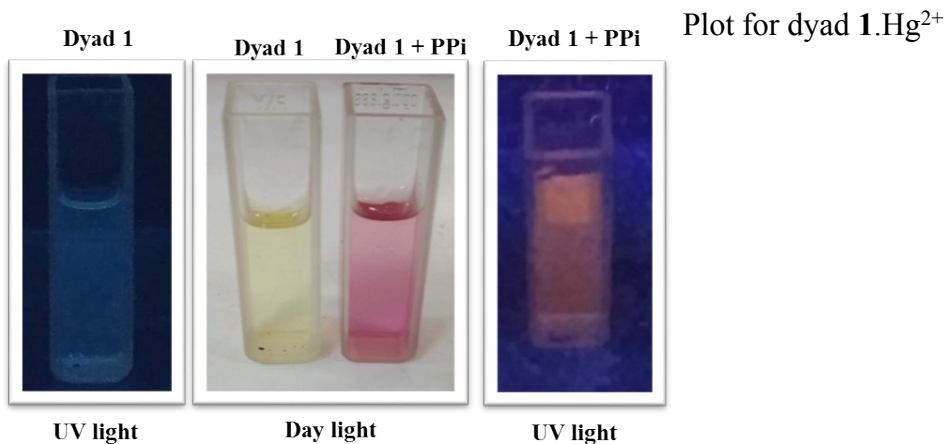

**Figure S6.** Colour changes of dyad 1 for PPI in daylight and under UV light.

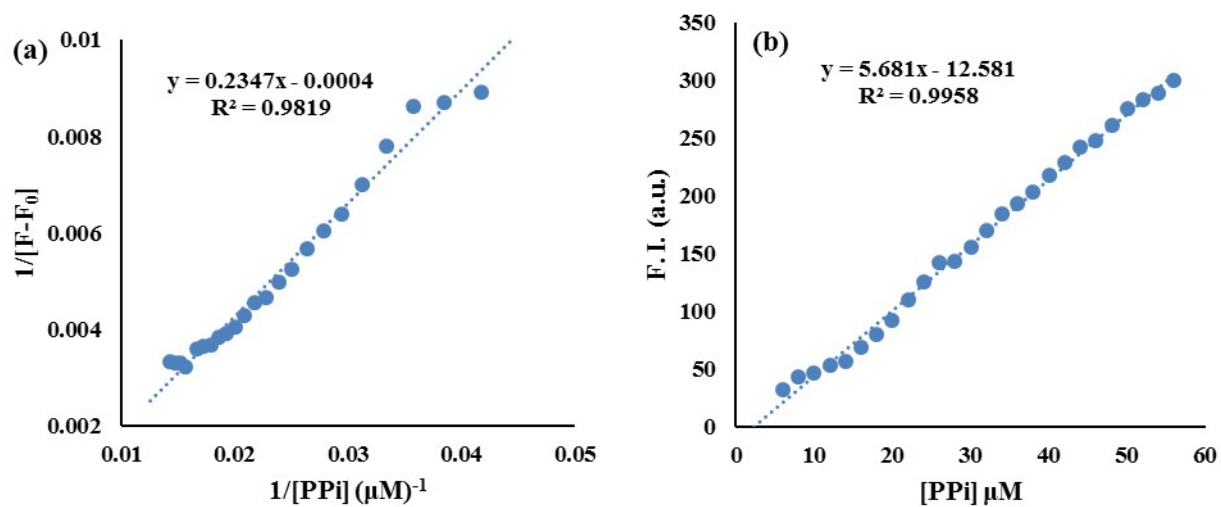

**Figure S7.** (a) Benesi-Hildebrand plot for stability constant and (b) calibration curve for lowest detection limit for dyad 1.PPI adduct.

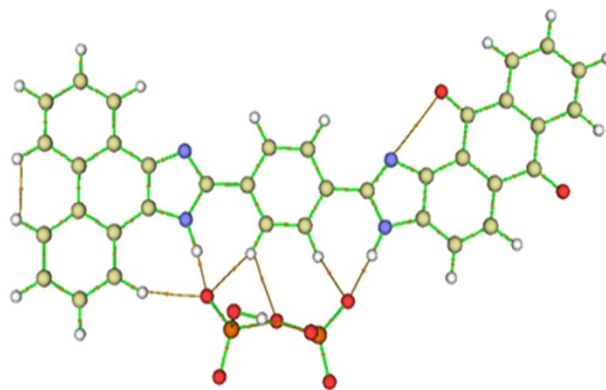

**Figure S8.** The molecular graph of dyad 1.PPi, with bond critical points and bond paths at interaction of dyad 1 towards PPi ions

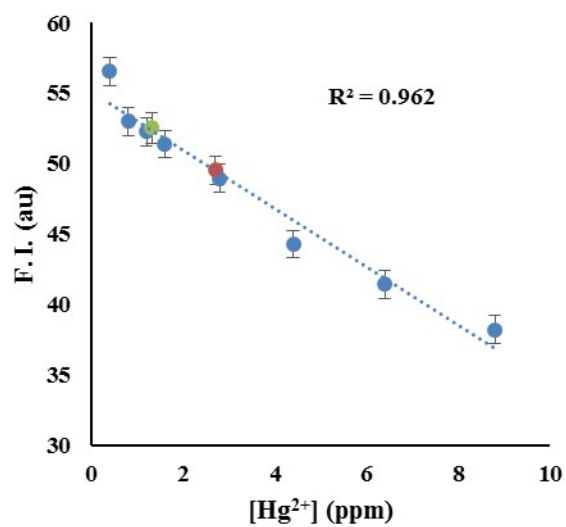

**Figure S9.** Calibration curve for variable concentration of Hg<sup>2+</sup> ions.

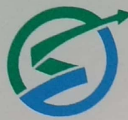

**Sophisticated Analytical Instruments Laboratories  
Society** (Registered as Society with Registrar of Firms & Societies, Punjab, Chandigarh)  
Thapar Technology Campus, Bhadson Road, Patiala-147 004 (India)

**TEST REPORT**

|                                                                                                      |                                 |                       |                                                      |
|------------------------------------------------------------------------------------------------------|---------------------------------|-----------------------|------------------------------------------------------|
| Test Report No.:                                                                                     | NN/18-19/047                    | Date:                 | 23.05.2018                                           |
| Service No.                                                                                          | NN/18-19/047 (01)               | Customer's Ref.       | Sample Submitted by Mr. Gulshan Kumar dtd 22.05.2018 |
| Customer's name and address:                                                                         |                                 |                       |                                                      |
| <b>M/s School of Chemistry and Biochemistry<br/>TIET<br/>Patiala.<br/>Kind Attn. Dr. Vijay Luxmi</b> |                                 |                       |                                                      |
| Sample Description                                                                                   | Liquid Sample (Research Sample) |                       |                                                      |
| Condition of the sample received                                                                     | O.K.                            |                       |                                                      |
| Customer's sample identification No. (if any)                                                        | -                               |                       |                                                      |
| Quantity/number of samples                                                                           | One                             |                       |                                                      |
| Sampling Procedure (if any)                                                                          | --                              |                       |                                                      |
| Test parameters                                                                                      | Mercury                         |                       |                                                      |
| Standard/Specification/Method followed                                                               | Atomic Absorption Spectrometer  |                       |                                                      |
| Deviations (if any)                                                                                  | --                              |                       |                                                      |
| Documents constituting this report (if any)                                                          | --                              |                       |                                                      |
| Date of Receipt of Job                                                                               | Date of Completion of Job       | Total Number of Pages |                                                      |
| 22.05.2018                                                                                           | 23.05.2018                      | 1                     |                                                      |

**TEST RESULTS**

| S. No. | Parameter     | Test Method                    | Unit | Results    |         |
|--------|---------------|--------------------------------|------|------------|---------|
|        |               |                                |      | Readings   | Average |
| 1.     | Mercury as Hg | Atomic Absorption Spectrometer | mg/l | i) 1.381   | 1.367   |
|        |               |                                |      | ii) 1.337  |         |
|        |               |                                |      | iii) 1.382 |         |

.....end of the report.....

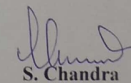  
**S. Chandra**

**Head, SAI Labs**  
(Authorized Signatory)

- Note:
1. The results listed refer only to the tested samples and applicable parameters. Endorsement of products is neither inferred nor implied.
  2. Samples will be destroyed after one month from the date of issue of the test report unless otherwise specified.
  3. This report is not to be reproduced wholly or in part and cannot be used as an evidence in the products is neither inferred nor implied court of law and should not be used in any advertising media without special permission in writing.
  4. In case any reconfirmation of contents of the test report is required, please contact the authorized signatory of the test report within 15 days of the issue of test report

SAI/FM/CSC-11

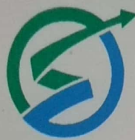

**Sophisticated Analytical Instruments Laboratories  
Society** (Registered as Society with Registrar of Firms & Societies, Punjab, Chandigarh)  
Thapar Technology Campus, Bhadson Road, Patiala-147 004 (India)

**TEST REPORT**

|                                                                                                      |                                 |                           |                                                      |
|------------------------------------------------------------------------------------------------------|---------------------------------|---------------------------|------------------------------------------------------|
| Test Report No.:                                                                                     | NN/18-19/029A                   | Date:                     | 09.05.2018                                           |
| Service No.                                                                                          | NN/18-19/029A (01)              | Customer's Ref.           | Sample Submitted by Mr. Gulshan Kumar dtd 09.05.2018 |
| Customer's name and address:                                                                         |                                 |                           |                                                      |
| <b>M/s School of Chemistry and Biochemistry<br/>TIET<br/>Patiala.<br/>Kind Attn. Dr. Vijay Luxmi</b> |                                 |                           |                                                      |
| Sample Description                                                                                   | Liquid Sample (Research Sample) |                           |                                                      |
| Condition of the sample received                                                                     | O.K.                            |                           |                                                      |
| Customer's sample identification No. (if any)                                                        | -                               |                           |                                                      |
| Quantity/number of samples                                                                           | One                             |                           |                                                      |
| Sampling Procedure (if any)                                                                          | --                              |                           |                                                      |
| Test parameters                                                                                      | Mercury                         |                           |                                                      |
| Standard/Specification/Method followed                                                               | Atomic Absorption Spectrometer  |                           |                                                      |
| Deviations (if any)                                                                                  | --                              |                           |                                                      |
| Documents constituting this report (if any)                                                          |                                 |                           |                                                      |
| Date of Receipt of Job                                                                               |                                 | Date of Completion of Job | Total Number of Pages                                |
| 09.05.2018                                                                                           |                                 | 09.05.2018                | 1                                                    |

**TEST RESULTS**

| S. No. | Parameter     | Test Method                    | Unit | Results    |         |
|--------|---------------|--------------------------------|------|------------|---------|
|        |               |                                |      | Readings   | Average |
| 1.     | Mercury as Hg | Atomic Absorption Spectrometer | mg/l | i) 2.705   | 2.76    |
|        |               |                                |      | ii) 2.716  |         |
|        |               |                                |      | iii) 2.848 |         |

.....end of the report.....

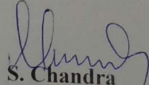  
**S. Chandra**  
Head, SAI Labs  
(Authorized Signatory)

- Note:
1. The results listed refer only to the tested samples and applicable parameters. Endorsement of products is neither inferred nor implied.
  2. Samples will be destroyed after one month from the date of issue of the test report unless otherwise specified.
  3. This report is not to be reproduced wholly or in part and cannot be used as an evidence in the products is neither inferred nor implied. court of law and should not be used in any advertising media without special permission in writing.
  4. In case any reconfirmation of contents of the test report is required, please contact the authorized signatory of the test report within 15 days of the issue of test report

SAI/FM/CSC-11



**Figure S10.** Reports of analysis  $\text{Hg}^{2+}$  ions two water samples though AAS.
